# Supplementary material for: Development and evaluation of an aged care specific Advance Care Plan
Source: PubMed Central journal article supplement — BMJ Support Palliat Care. 2013 Mar 14;3(2):188–95. doi: 10.1136/bmjspcare-2012-000392 (PMC3632978; doi:10.1136/bmjspcare-2012-000392), 2013-03-14
Supplement: bmjspcare-2012-000392-s1.pdf [file bmjspcare-2012-000392-s1.pdf]

Supplementary table 1: Advance Care Plan template pilot stakeholder consultation questions

- 
- Was the language and the wording on the form at the right level for a) staff; b) consumers?
  - Was the font size and space allocation for writing wishes adequate?
  - Was the form easy to follow? Did it flow?
  - Who trialled the form?
  - Were the prompts on the form helpful in supporting and guiding the process of advance care planning for staff and consumers?
  - Did you complete advance care plans for both competent and non competent residents? If so was the form adequate for both?
  - Were any GP's involved in the advance care planning process, using this form? Did they provide any comments on the form?
  - Did the three choices in the "My Requests" box assist you in being able to document the resident's wishes?
-
